# Supplementary material for: Expression profiling of some Acute Myeloid Leukemia - associated markers to assess their diagnostic / prognostic potential
Source: PubMed Central journal article supplement (PMC7802071; doi:10.1590/1678-4685-gmb-2019-0268), 2021-01-06
Supplement: 1415-4757-GMB-44-1-e20190268-s1.pdf [file 1415-4757-GMB-44-1-e20190268-s1.pdf]

## Supplementary Material to “Expression Profiling of Some Acute Myeloid Leukemia - Associated Markers to Assess their Diagnostic / Prognostic Potential”

**Table S1** - Clinical data of AML patient group. Corresponding values of control subjects were within normal range (data not shown).

| Patient # | Age | Gender | FAB Classification              | Hemoglobin | Platelets | TLC    | BA% |
|-----------|-----|--------|---------------------------------|------------|-----------|--------|-----|
| 1         | 50  | Female | AML-M4                          | 7.2        | 44        | 181.27 | 82% |
| 2         | 25  | Female | AML-M4                          | 6.5        | 27        | 145.09 | 90  |
| 3         | 42  | Female | AML-M3                          | 9.9        | 22        | 2.87   | 4   |
| 4         | 49  | Female | AML-M2                          | 4.4        | 11        | 34     | 27  |
| 5         | 58  | Female | RAEB-MDS-II (AML on top of MDS) | 7          | 30        | 2.2    | 15  |
| 6         | 25  | Male   | AML-M1                          | 10         | 173       | 18.3   | 95  |
| 7         | 40  | female | AML-M1                          | 3          | 79        | 7.23   | 71  |
| 8         | 21  | female | AML-M2                          | 6.4        | 27        | 4.32   | 70  |
| 9         | 52  | female | AML-M4                          |            |           |        | 36  |
| 10        | 59  | Male   | AML-M1                          | 7.4        | 14        | 3.8    | 86  |
| 11        | 21  | Male   | AML-M2 (on top of CML)          | 7.3        | 17        | 9.95   | 54  |
| 12        | 68  | female | AML-M1                          | 7.5        | 29        | 26.5   | 79  |
| 13        | 68  | female | AML-M0                          | 10.4       | 77.9      | 30.2   | 93  |
| 14        | 51  | Male   | AML-M3                          | 10         | 25        | 2.7    | 4   |
| 15        | 45  | female | AML-M4                          | 9.2        | 25        | 14     | 30  |
| 16        | 27  | female |                                 | 6.2        | 241       | 273    |     |
| 17        | 30  | Male   | AML-M1                          | 8.4        | 36        | 22     | 79  |
| 18        | 46  | Male   | AML-M1                          | 5.2        | 28        | 33.31  | 93  |
| 19        | 26  | female | AML-M1                          | 6.9        | 10        | 129.89 | 92  |
| 20        | 48  | Male   | AML-M2                          | 2.9        | 6         | 6      | 48  |
| 21        | 46  | Male   | AML-M1                          | 8          | 42        | 214    | 76  |
| 22        | 54  | Male   | AML-M5b                         | 9.4        | 26        | 63.5   | 38  |
| 23        | 41  | Male   | AML-M3                          | 10         | 23        | 3      | 15  |
| 24        | 25  | Male   | AML-M2                          | 7.4        | 382       | 3.4    | 18  |
| 25        | 45  | Male   | AML-M0                          | 10.2       | 78        | 29.8   | 90  |
| 26        | 21  | Male   | AML-M3                          | 9.4        | 22        | 2.9    | 6   |
| 27        | 40  | Male   | AML-M1                          | 8.5        | 8         | 75     | 74  |
| 28        | 49  | female | AML-M4                          | 7.3        | 43        | 179.5  | 79% |
| 29        | 26  | female | AML-M4                          | 6.4        | 26        | 144.3  | 89  |
| 30        | 43  | female | AML-M3                          | 10         | 21        | 3.01   | 5   |
| 31        | 48  | female | AML-M2                          | 4.4        | 10.8      | 35     | 28  |
| 32        | 57  | female | RAEB-MDS-II (AML on top of MDS) | 6.9        | 29        | 2.3    | 16  |
| 33        | 26  | Male   | AML-M1                          | 9.9        | 172.5     | 17.9   | 94  |
| 34        | 39  | female | AML-M1                          | 3.1        | 77        | 7.18   | 72  |
| 35        | 22  | female | AML-M2                          | 5.9        | 29        | 4.5    | 70  |
| 36        | 49  | female | AML-M4                          | 8          | 50        | 169    | 36  |
| 37        | 57  | Male   | AML-M1                          | 7.4        | 14        | 3.8    | 86  |
| 38        | 21  | Male   | AML-M2 (on top of CML)          | 7.3        | 17        | 9.95   | 54  |
| 39        | 68  | female | AML-M1                          | 7.5        | 29        | 26.5   | 79  |
| 40        | 68  | female | AML-M0                          | 9.9        | 77.9      | 30.2   | 93  |
| 41        | 51  | Male   | AML-M3                          | 10         | 25        | 2.7    | 4   |

| <b>Patient #</b> | <b>Age</b> | <b>Gender</b> | <b>FAB Classification</b> | <b>Hemoglobin</b> | <b>Platelets</b> | <b>TLC</b> | <b>BA%</b> |
|------------------|------------|---------------|---------------------------|-------------------|------------------|------------|------------|
| 42               | 44         | female        | AML-M4                    | 8.9               | 23.5             | 15.5       | 30         |
| 43               | 28         | female        | AML-M1                    | 6.5               | 250              | 267        |            |
| 44               | 30         | Male          | AML-M1                    | 8.1               | 35.9             | 24         | 79         |
| 45               | 46         | Male          | AML-M1                    | 5.2               | 28               | 33.31      | 93         |
| 46               | 26         | female        | AML-M1                    | 7.1               | 9.5              | 131        | 92         |
| 47               | 48         | Male          | AML-M2                    | 2.9               | 5.7              | 6.2        | 48         |
| 48               | 46         | Male          | AML-M1                    | 7.5               | 36               | 213        | 76         |
| 49               | 54         | Male          | AML-M5b                   | 9.1               | 25               | 59         | 38         |
| 50               | 41         | Male          | AML-M3                    | 10                | 23               | 2.9        | 15         |
| 51               | 25         | Male          | AML-M2                    | 7.2               | 400              | 3.2        | 18         |
| 52               | 45         | Male          | AML-M0                    | 10.2              | 78               | 29.8       | 90         |
| 53               | 21         | Male          | AML-M3                    | 9.2               | 21               | 2.7        | 6          |
| 54               | 39         | Male          | AML-M1                    | 8.7               | 7                | 81         | 74         |
