# Supplementary material for: Expression profiling of some Acute Myeloid Leukemia - associated markers to assess their diagnostic / prognostic potential
Source: PubMed Central journal article supplement (PMC7802071; doi:10.1590/1678-4685-gmb-2019-0268), 2021-01-06
Supplement: 1415-4757-GMB-44-1-e20190268-s2.pdf [file 1415-4757-GMB-44-1-e20190268-s2.pdf]

## Supplementary Material to “Expression Profiling of Some Acute Myeloid Leukemia - Associated Markers to Assess their Diagnostic / Prognostic Potential”

**Table S2** - Frequency of occurrence of cell surface markers of AML patients.

| Cell surface marker | Frequency of occurrence |            |
|---------------------|-------------------------|------------|
|                     | Number (n=54)           | Percentage |
| MPO                 | 54                      | 100        |
| CD13                | 54                      | 100        |
| CD33                | 50                      | 92.6       |
| CD4                 | 9                       | 16.6       |
| CD11c               | 10                      | 18.5       |
| CD117               | 20                      | 37.0       |
| MHC-II              | 32                      | 59.3       |
| CD14                | 6                       | 11.1       |
| Tdt                 | 2                       | 3.7        |
| CD34                | 25                      | 46.3       |
| CD7                 | 8                       | 14.8       |
